# Supplementary material for: Multifunctional polyoxometalates-modified upconversion nanoparticles: integration of electrochromic devices and antioxidants detection
Source: Royal Society of Chemistry journal article supplement (doi:10.1039/c2cc38292j), 2012-12-22
Supplement: c2cc38292j.pdf [file c2cc38292j.pdf]

# Supplementary Information

## Multifunctional Polyoxometalates-Modified Upconversion Nanoparticles: Integration of Electrochromic Devices and Antioxidants Detection

Yanling Zhai, Chengzhou Zhu, Jiangtao Ren, Erkang Wang, and Shaojun Dong\*

*State Key Laboratory of Electroanalytical Chemistry, Changchun Institute of Applied Chemistry, Graduate School of the Chinese Academy of Sciences, Chinese Academy of Sciences, Changchun, 130022, China.*

### 1. EXPERIMENTAL SECTION

**1.1 Materials** The rare-earth oxides  $\text{Yb}_2\text{O}_3$ ,  $\text{Er}_2\text{O}_3$ , and  $\text{Tm}_2\text{O}_3$  (purity > 99.99%) were obtained from the Changchun Hepalink rare-earth materials company. Oleic acid and octadecene were purchased from Sigma-Aldrich. Poly(diallyldimethylammonium chloride) (PDDA) and poly(allylamine hydrochloride) (PAH) were obtained from Sigma. 1-octadecene (ODE, 90%), oleic acid (OA, 90%), polyoxyethylene (5) nonylphenyl ether (Igepal CO-520), tetraethyl orthosilicate (TEOS), ethylenediaminetetraacetic acid disodium salt (EDTA) and 3-aminopropyltriethoxysilane (APTES) were purchased from Aldrich. 1-hexanol, cyclohexane,  $\text{Na}_2\text{WO}_4 \cdot 2\text{H}_2\text{O}$  and ammonium hydroxide (25-28 wt %) were purchased from Beijing Chemical Reagent Company (Beijing, China). Other chemicals were of analytical grade and used as received without further purification. Acetate buffer solution (pH = 4.5) containing 0.1 M NaAc and 0.1 M HAc was used as the electrolyte throughout the experiments. Water used throughout all experiments was purified with a Millipore system.

**1.2 Apparatus** Transmission electron microscope (TEM) images were obtained with a TECNAI G2 high-resolution TEM operating at 200 kV. Absorption measurements were performed on a Cary 500 UV vis NIR spectrometer (Varian). Luminescence measurements were measured on a Photon Technology International (PTI) Time master fluorescence lifetime spectrometer equipped with GL-302 dye laser pumped by PTI GL-3300 nitrogen laser and a GL-303 frequency doubler. Spectroelectrochemical measurements (in situ luminescence) were carried out in a modified luminescence cell. The electrochemical experiments were conducted with a CHI 832C electrochemical workstation (Shanghai Chenhua Instrument Corporation, China). The substrates were commercial conducting indium tin oxide (ITO, surface resistance <20  $\Omega$ /square) with a geometric area of ~1 cm $\times$ 5 cm purchased from Nanbo Display Technology Co., Ltd. (Shenzhen, China).

**1.3 Synthesis of hydrophilic and OA-stabilized UCNPs:** The hydrophilic UCNPs were prepared according to the literature.<sup>1</sup> A total 4mL of Y(NO<sub>3</sub>)<sub>3</sub>, Yb(NO<sub>3</sub>)<sub>3</sub>, and Er(NO<sub>3</sub>)<sub>3</sub> (0.2 M) (molar ratio, Y/Yb/Er = 80:18:2) was added into 0.8 mmol of EDTA solution and stirred for 1 h. Then, 12 mL of NaF aqueous solution (0.8 M) was added into the above solution and stirred for another 1 h. The as-obtained mixing solution was transferred into a Teflon bottle, and maintained at 180 °C for 2 h. After cooled to room temperature, the precipitates were separated by centrifugation and washed several times with deionized water and ethanol and then dried in air.

Yb<sub>2</sub>O<sub>3</sub>, Er<sub>2</sub>O<sub>3</sub>, and Y<sub>2</sub>O<sub>3</sub> were separately dissolved in excess 1:1 hydrochloric acid aqueous solution at 80 °C. After the hydrochloric acid and water evaporated at 140 °C, the resulting powders were redispersed in water to yield the YbCl<sub>3</sub> (0.4 M), ErCl<sub>3</sub> (0.2 M), and YCl<sub>3</sub> (0.4 M) aqueous stock solutions. OA-stabilized UCNPs were prepared according to the literature.<sup>2</sup> Typically, YCl<sub>3</sub> (3 mL), YbCl<sub>3</sub> (0.675mL) and ErCl<sub>3</sub> (0.15 mL) aqueous solution were injected in a 50 mL flask. After removal of the water, 15 mL oleic acid and 22.5 mL octadecene were added, and the solution was heated to 160 °C to form a homogeneous solution, and then cooled down to room temperature. Subsequently, methanol solution (15 mL) containing NH<sub>4</sub>F (0.224 g) and NaOH (0.15

g) were slowly added into the flask. After vigorous stirring for 30 min, the solution was slowly heated to 220<sup>0</sup>C to remove the residual water and impurities with low boiling point under Ar protection. Thereafter, the temperature was increased to 300<sup>0</sup>C at a rate of 10<sup>0</sup>C min<sup>-1</sup> and remained at this temperature for 1.5 h. After the solution was cooled naturally, the nanoparticles were obtained from the solution with ethanol, and washed with ethanol/water (1:1 v/v) for three times, and finally redispersed in cyclohexane.

#### **1.4 Synthesis of K<sub>12.5</sub>Na<sub>1.5</sub>[NaP<sub>5</sub>W<sub>30</sub>O<sub>110</sub>].5H<sub>2</sub>O-coated NaYF<sub>4</sub>: Yb<sup>3+</sup>/Er<sup>3+</sup>@SiO<sub>2</sub> nanoparticles (UCNPs@Na-POMs)**

The mixture solution of UCNPs cyclohexane solution (4 mL, 0.01 M), CO-520 (0.1 mL), and cyclohexane (6 mL) in a flask was stirred for 10 min, then CO-520 (0.4 mL) and ammonia (0.08 mL) were added and the container was sealed and sonicated for 20 min to form a transparent emulsion. The solution was stirred for one day after adding TEOS (0.04 mL). Silica/NaYF<sub>4</sub> nanospheres were isolated by acetone, followed by centrifuging and washing with ethanol and water several times to remove surfactant molecules. Finally, the obtained UCNPs were modified with 3-aminopropyltriethoxysilane (APTES) stirring for 24 h, and then added into Na-POMs solution (0.01 mM) prepared according to the previous report for 3 h. After centrifuging, these UCNPs/Na-POMs were suspended in 10 mL deionized water by ultrasonication for the further experiments.

#### **1.5 Preparation of PAH/UCNPs@Na-POMs/PDDA film on the ITO Electrode**

Before modification, ITO slides were washed with acetone, ethanol and 1 M sodium hydroxide solution (H<sub>2</sub>O: ethanol 1:1, v/v) for 15 min ultrasonic bath successively, and finally rinsed with pure water and dried under N<sub>2</sub> flow. The chips were dipped in PAH aqueous solution (5 mg/mL) for 15 min, then rinsed with water several times to remove the physically adsorbed PAH, and dried under N<sub>2</sub> flow. After that, ITO/PAH modified electrodes were dipped into 5 mM UCNPs@Na-POMs solution for 30 min and then 2 μL PDDA (0.5 mg/mL) was cast on the surface to fabricate PAH/UCNPs@Na-POMs/PDDA film.

## 2. FIGURE

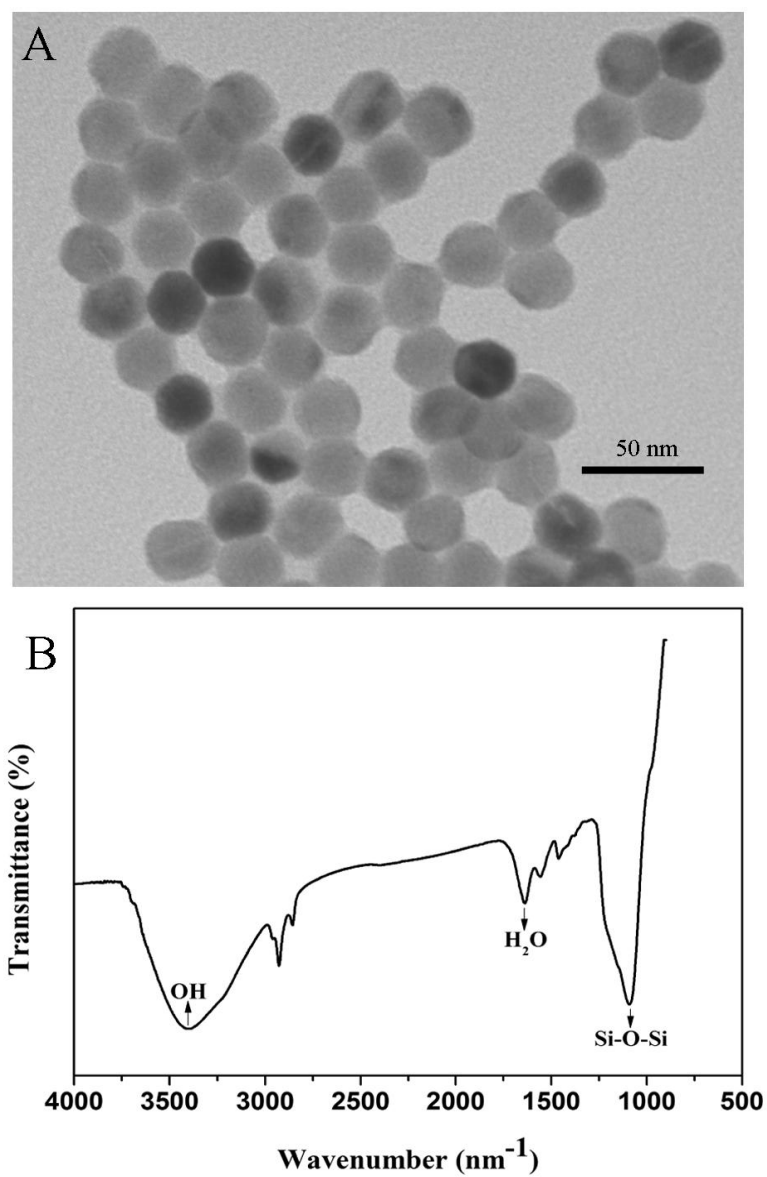

**Fig. S1.** TEM (A) and FTIR (B) spectra of  $\text{NaYF}_4: \text{Yb}^{3+}/\text{Er}^{3+}@\text{SiO}_2$ .

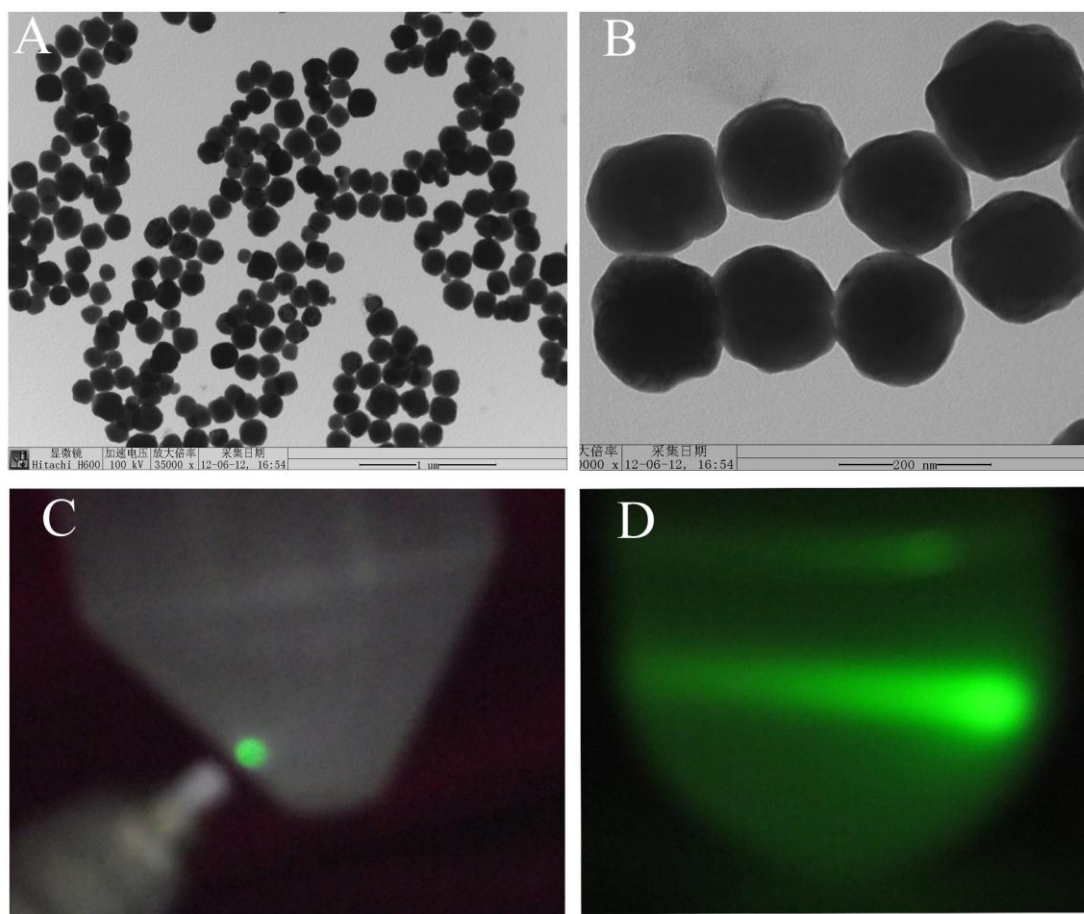

**Fig. S2** TEM (A) and high-resolution TEM (B) images of hydrophilic UCNPs; The upconversion luminescence photograph of hydrophilic (C) and OA-stabilized (D) UCNPs under excitation at 980 nm.

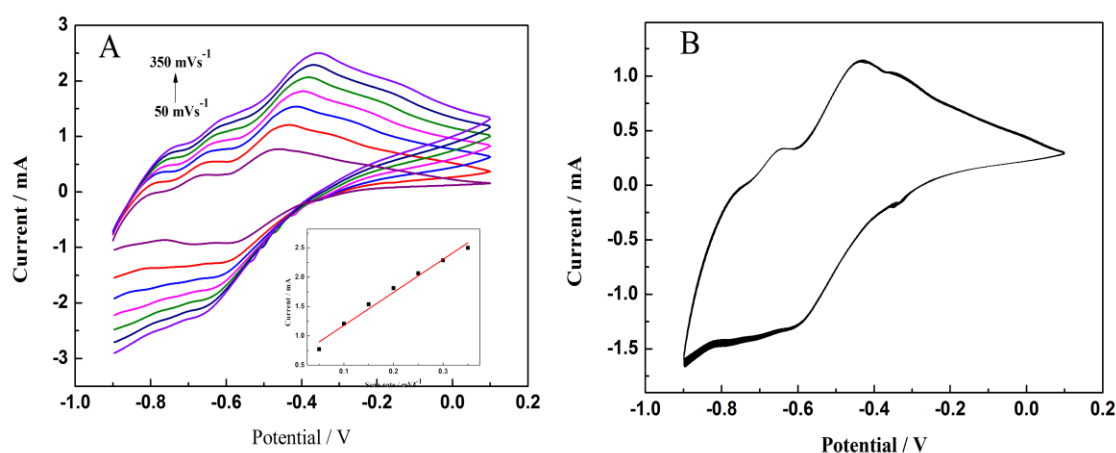

**Fig. S3** (A) Cyclic voltammograms (CVs) of ITO/PAH/UCNPs@Na-POMs/PDDA electrode at different scan rates (from inner to outer): 0.05, 0.1, 0.15, 0.2, 0.25, 0.3 and 0.35 v/s. Inset: plot of peak current ( $I_p$ ) vs. scan rate; (B) 100 consecutive CVs of the prepared electrode at  $100 \text{ mVs}^{-1}$  in 0.1 M HAc-NaAc buffer solution (pH = 4.5).

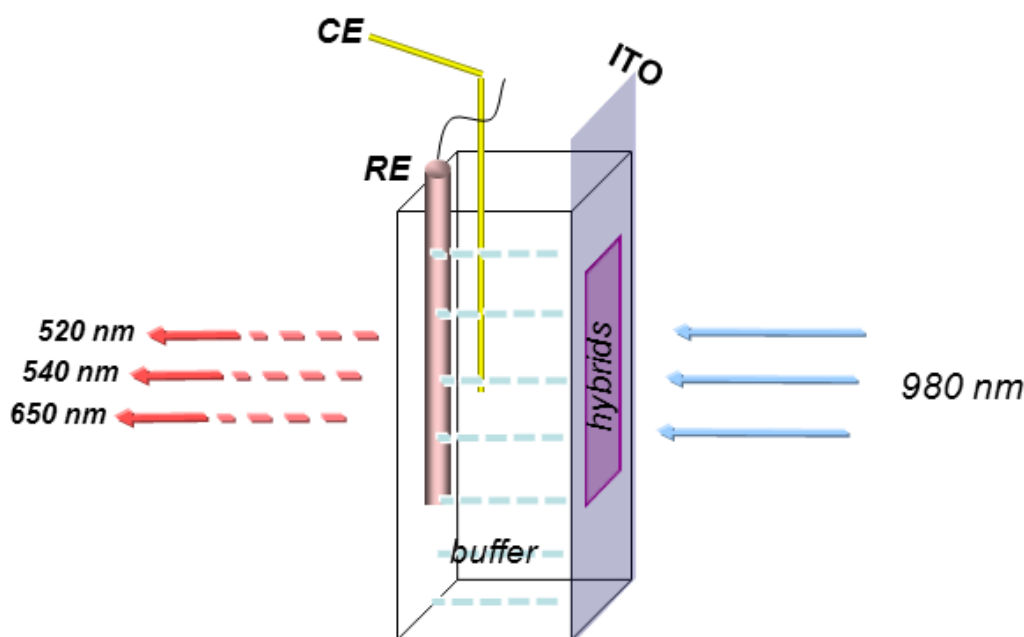

**Fig. S4** Schematic representation of fluorescence spectroelectrochemical cell

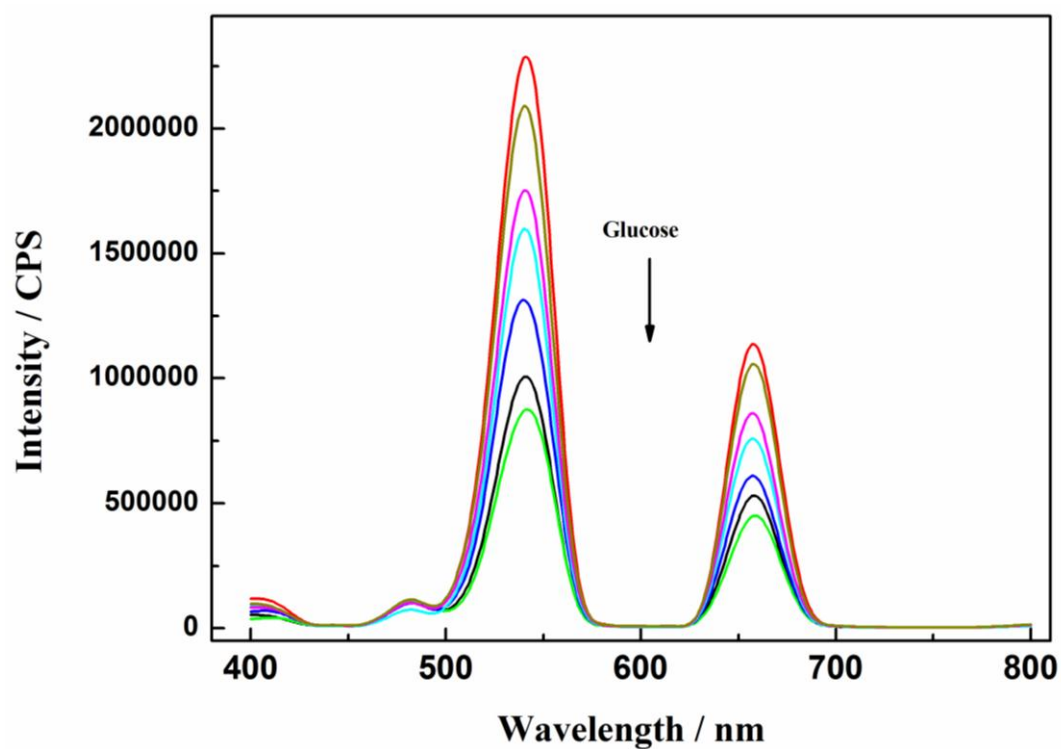

**Fig. S5** Photoluminescence response of POM-modified  $\text{NaYF}_4\text{:Yb/Er@SiO}_2$  as a function of glucose concentration (0, 1, 3, 5, 10, 20, 40 mM) in an aqueous solution.

## References:

1. Dai, Y.; Ma, P.; Lin, J. *ACS Nano* **2012**, *6*, 3327–3338.
2. Li, Z.; Zhang, Y.; Jiang, S. *Adv. Mater.* **2008**, *20*, 4765–4769.
